ShockWave Therapy (ESWT) as a novel, non-invasive treatment for IC. We aim to compare the effects of ESWT on quality of life (QoL) and walking distances of patients with lower limb IC through a randomised trial.

**Methods:** A double-blind, placebo-controlled, randomised trial, where patients with lower limb IC were randomised at a 1:1 ratio to ESWT or placebo. Primary outcome was the physical functioning domain of the SF-36 QoL questionnaire at 12-week follow up. Secondary outcomes included claudication and maximum walking distances, and Ankle Brachial Pressure Index (ABPI).

**Results:** Full study power achieved with 138 patients randomised. The ESWT group had a significantly higher physical function score at 12 weeks (Mdn 41 vs 34,  $z=-2.1$ ,  $p=0.033$ ). At 12 weeks the ESWT group had significantly longer claudication and maximum walking distances (Claudication Mdn 125 vs 88,  $z=-2.9$ ,  $p=0.004$ ) (Maximum Mdn 179 vs 129,  $z=-2.4$ ,  $p=0.013$ ). The increase in claudication and maximum walking distance at 12 weeks from baseline was also significantly higher in the ESWT group (Mdn 51 vs 24,  $z=-2.8$ ,  $p<0.01$ ) (Mdn 63 vs 17,  $z=-4$ ,  $p<0.01$ ).

**Conclusion:** This study demonstrates ESWT is clinically effective in improving QoL and walking distances in patients with lower limb IC.

## SPOD

### SPOD.01

#### A double-blind, placebo-controlled, randomised trial of extracorporeal shockwave therapy as a novel treatment for intermittent claudication

Paris Cai<sup>1,2</sup>, Sean Pymmer<sup>1,2</sup>, Ali Raza<sup>2</sup>, Said Ibeggazene<sup>1,2</sup>, Ian Chetter<sup>1,2</sup>, George Smith<sup>1,2</sup>

<sup>1</sup>Hull York Medical School, <sup>2</sup>Hull University Teaching Hospitals NHS Trust

**Aims:** Intermittent claudication (IC) is a prevalent manifestation of peripheral arterial disease. Pilot data has shown Extracorporeal
